# Supplementary material
Source: PubMed Central journal article supplement (PMC5259558)
Supplement: NIHMS840101-supplement-Appendix___Figures.pdf [file NIHMS840101-supplement-Appendix___Figures.pdf]

## Supplementary Appendix

This appendix has been provided by the authors to give readers additional information about their work.

Supplement to: Park JW, Liu MC, Yee D, et al. Adaptive randomization of neratinib in early breast cancer. *N Engl J Med* 2016;375:11-22. DOI: [10.1056/NEJMoa1513750](https://doi.org/10.1056/NEJMoa1513750)

## **Supplementary Appendix**

Supplement to Park, J, Liu, M, Yee, D *et al.* “*I-SPY 2 TRIAL Adaptive Randomization of Neratinib in Breast Cancer*”

### **Table of Contents**

|                                                                                                                                            |                  |
|--------------------------------------------------------------------------------------------------------------------------------------------|------------------|
| <b>Additional Study Design Details</b>                                                                                                     | <b>Page 2</b>    |
| <b>Figure S1:</b> Definition of MP1 and MP2 subtype:                                                                                       | <b>Page 4</b>    |
| <b>Table S1:</b> Eligible signatures and their biomarker subtypes composition                                                              | <b>Page 5</b>    |
| <b>Table S2:</b> Randomization probabilities to neratinib for the various biomarker subtypes in the latter part of its tenure in the trial | <b>Page 6</b>    |
| <b>Table S3:</b> Change in diarrhea management protocol and prevalence of Grade 2-3 diarrhea over the course of the study                  | <b>Page 7</b>    |
| <b>List of Contributing Sites, Investigators, and Staff in the I-SPY 2 TRIAL</b>                                                           | <b>Page 8-11</b> |

## Additional Study Design Details

To determine treatment assignment probabilities for patients entering the trial population is categorized into 8 disease subtypes defined by a 2 x 2 x 2 arrangement of the 3 biomarkers HR (ER/PgR), HER2, and MP (Table S1). Each week during the trial the current probability distribution of each regimen's pCR rate is updated based on the data available in the trial. These distributions are found for each of these 8 subtypes based on a multivariate analysis with covariates HR, HER2, and MP. In each subtype 20% of the patients are assigned to control therapy. The remaining 80% is apportioned to the available experimental regimens in proportion to each regimens current probability of being the most effective therapy for that subtype.

Primary endpoint pCR is assessed at surgery approximately 6 months after initiation of therapy. To improve the efficiency of the adaptive randomization algorithm the design uses a longitudinal model of tumor burden during therapy to predict each patient's pCR result. MRI measurements are made 3 weeks and 12 weeks after initiation of therapy, with the latter timepoint coinciding with the end of the paclitaxel-based cycles. The prior distribution for this longitudinal model was based on MRI results from I-SPY 1<sup>1</sup> and was updated based on results accruing in the present I-SPY 2 trial. Each patient in the trial who has not yet had surgery has a probability of experiencing a pCR based on MRI measurements of her tumor. To account for uncertainty in predicting each result calculations use multiple imputation.<sup>2</sup> Though these interim MRI results helped in determining the randomization assignment probabilities the results reported here are based only on the actual pCR results in the trial, and on tumor biomarkers.

Deciding to graduate or drop a regimen for futility is based on its performance in 10 prospectively defined subsets of tumor subtypes called "signatures." These are defined in Supplementary Table 3 and also in the Results section. Each regimen is compared with its concurrently randomized control group, which differs across regimens because they have different periods of tenure in the trial. Each month the probability distribution of each regimen's pCR rate in each of the 10 signatures is found and reported to the trial's DSMB. These probability distributions are standardized to the proportions of patients in the various biomarker subtypes across the entire trial and not based on the proportions of patients assigned to the regimen in question. Also reported to the DSMB by signature are (i) the current probabilities for each regimen that its pCR rate is greater than that of control and (ii) the current predictive probabilities that the regimen will show a statistically significance improvement in pCR rate in

comparison with control in a subsequent equally randomized 300-patient phase 3 trial with patients having tumors with the signature in question.

An experimental regimen with having been assigned to a total of at least 60 patients and a predictive probability greater than or equal to 85% in any signature graduates in that signature. A regimen with predictive probability less than 10% in all 10 signatures drop for futility with as few as 20 patients having been assigned. The maximum total number of patients assigned to any regimen is 120.

Operating characteristics for the trial were found using simulations. Many types of error are possible in a multiarm trial for which there are many possible conclusions for each arm. For example, one may conclude that an arm's signature is HR-negative/HER2-positive when its true signature is HER2-positive, and the same when the signatures are reversed. In both cases the conclusion is partly correct and partly incorrect. In addition, error rates for a particular regimen depend on which other regimens are in the trial. We set the type I error to be less than 10% when there are a small number of experimental regimens in the trial and the regimen in question has no effect for any signature and the design concludes that it does. And the trial design typically has at least 80% power when a signature has at least a log odds ratio of 1.5 in comparison with control. In terms of sample size in the simulations, the average ranged from 60 to 90 depending on the scenario assumed.

1. Esserman LJ, Berry DA, Cheang MC, et al. Chemotherapy response and recurrence-free survival in neoadjuvant breast cancer depends on biomarker profiles: results from the I-SPY 1 TRIAL (CALGB 150007/150012; ACRIN 6657). *Breast Cancer Res Treat* 2011.
2. Little RJA, Rubin, D.B. *Statistical Analysis with Missing Data*. 2nd ed: J Wiley & Sons: New York; 2002.

**Figure S1**

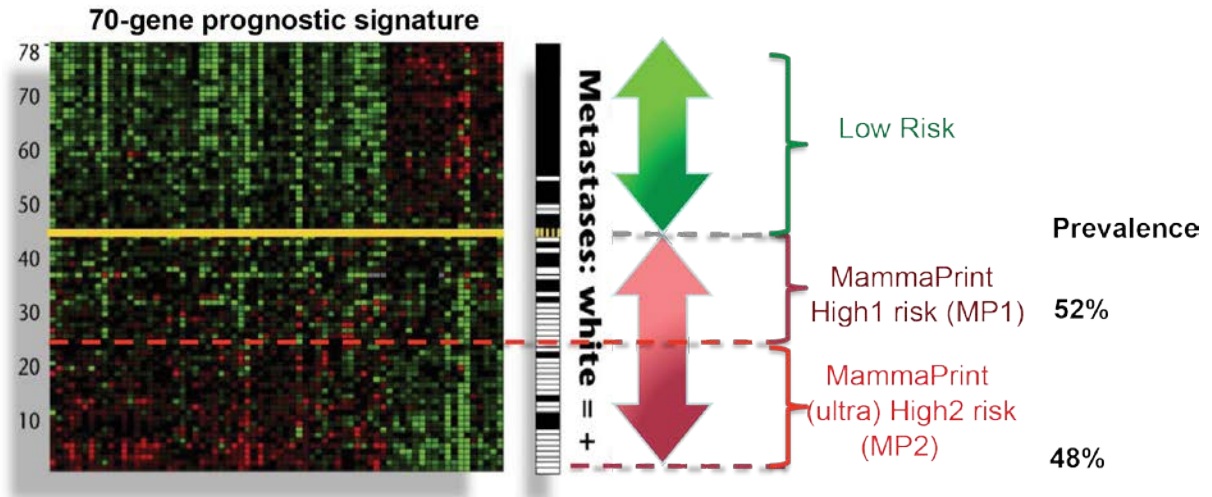

**Figure S1**

**Definition of MP1 and MP2 subtype:** The figure depicts a heat map representation of the 70 genes in the MammaPrint score. The rows are the patients, and the columns are each of the 70 genes. The cut point of -0.154 for MP1 vs MP 2 is the midpoint of I-SPY 1 patient MammaPrint results that would have been eligible for I-SPY 2. The MP1 to MP2 threshold on the current commercially available MP test translates to  $-0.569$ , after an adjustment of the high versus low threshold to 0.00 (numerical subtraction of 0.415). The prevalence for each of the subtypes (as of August 2015) in the I-SPY 2 TRIAL is listed along the right hand border of the figure.

## Table S1: Eligible signatures and their biomarker subtypes composition

Biomarker assessments (HER2, HR, MammaPrint) performed at baseline are used to classify patients into  $2 \times 2 \times 2 = 8$  prospectively defined subtypes for randomization purposes. To assess efficacy, ten clinically relevant biomarker ‘signatures’ were defined in the protocol: All; HR+; HR-; HER2+; HER2-; MP Hi-2; HER2+/HR+; HER2+/HR-; HER2-/HR+; HER2-/HR-.

**A**

|       |  | Biomarker Cells |         |         |         |
|-------|--|-----------------|---------|---------|---------|
|       |  | HR+             |         | HR-     |         |
|       |  | MP Hi-1         | MP Hi-2 | MP Hi-1 | MP Hi-2 |
| HER2+ |  |                 |         |         |         |
| HER2- |  |                 |         |         |         |

  

**B**

|                     |                      | Composition of Eligible Signatures |         |          |         |          |         |          |         |
|---------------------|----------------------|------------------------------------|---------|----------|---------|----------|---------|----------|---------|
|                     |                      | HR+HER2-                           |         | HR+HER2+ |         | HR-HER2+ |         | HR-HER2- |         |
|                     |                      | MP Hi-1                            | MP Hi-2 | MP Hi-1  | MP Hi-2 | MP Hi-1  | MP Hi-2 | MP Hi-1  | MP Hi-2 |
| Eligible Signatures | ALL                  |                                    |         |          |         |          |         |          |         |
|                     | HR+                  |                                    |         |          |         |          |         |          |         |
|                     | HR-                  |                                    |         |          |         |          |         |          |         |
|                     | HER2+                |                                    |         |          |         |          |         |          |         |
|                     | HER2-                |                                    |         |          |         |          |         |          |         |
|                     | MP Hi-2 (Ultra high) |                                    |         |          |         |          |         |          |         |
|                     | HER2+/HR+            |                                    |         |          |         |          |         |          |         |
|                     | HER2+/HR-            |                                    |         |          |         |          |         |          |         |
|                     | HER2-/HR+            |                                    |         |          |         |          |         |          |         |
|                     | HER2-/HR-            |                                    |         |          |         |          |         |          |         |

**(A)** The  $2 \times 2 \times 2$  color table shows the 8 biomarker subtypes as defined by HR, HER2, and MP status. Biomarker subtypes are color-coded as follows: HR+HER2+ MP-1 (orange); HR+HER2+ MP-2 (beige); HR+HER2- MP-1 (dark blue); HR+HER2- MP-2 (light blue); HR-HER2+ MP-1 (brown); HR-HER2+ MP-2 (tan); HR-HER2- MP1 (red); HR-HER2- MP2 (pink).

**(B)** This color table shows the biomarker subtype composition of the 10 eligible signatures in which an experimental agent can ‘graduate’ in the I-SPY 2 TRIAL. Subtypes within the eligible signature are colored (HR+HER2+ MP-1 (orange); HR+HER2+ MP-2 (beige); HR+HER2- MP-1 (dark blue); HR+HER2- MP-2 (light blue); HR-HER2+ MP-1 (brown); HR-HER2+ MP-2 (tan); HR-HER2- MP1 (red); HR-HER2- MP2 (pink)); and subtypes not within eligible signatures are left white.

**Table S2: Randomization probabilities to neratinib for the various biomarker subtypes in the latter part of its tenure in the trial**

|       | MP1 (Hi-1) |     | MP2 (Hi-2, Ultra High) |     |
|-------|------------|-----|------------------------|-----|
|       | HR+        | HR- | HR+                    | HR- |
| HER2+ | +          | ++  | +                      | ++  |
| HER2- | 0          | 0   | +                      | +   |

Table S2

**Table Legend:** The probability of being randomized, at the end of the trial, at the time of graduation, for the given tumor biomarker subtype, is indicated in the table (0= zero probability of randomization, + moderate probability of randomization, ++ high probability of randomization). This demonstrates that non-Her2 positive MP1 patients were not being randomized to Neratinib at the time of graduation.

**Table S3: Change in diarrhea management protocol and prevalence of Grade 2-3 diarrhea over the course of the study**

| Time Period          | Diarrhea Management                              | Patients in Treatment Arm (n) | Prevalence, n (%) |                  |                                                                 |
|----------------------|--------------------------------------------------|-------------------------------|-------------------|------------------|-----------------------------------------------------------------|
|                      |                                                  |                               | Grade 2 Diarrhea  | Grade 3 Diarrhea | Neratinib dose modifications (reductions/holds/discontinuation) |
| Before 4/6/2011      | Dose holds and reductions for Grade 2/3 diarrhea | 21                            | 13 (61.9%)        | 10 (47.6%)       | 13 (61.9%)                                                      |
| 4/6/2011 - 1/16/2012 | Patient material for diarrhea management         | 52                            | 31 (59.6%)        | 22 (42.3%)       | 36 (69.2%)                                                      |
| After 1/16/2012      | Prophylactic loperamide                          | 72                            | 40 (55.6%)        | 26 (36.1%)       | 48 (66.7%)                                                      |



## List of Contributing Sites, Investigators, and Staff in the I-SPY 2 TRIAL:

Note: Names that appear in brackets no longer reside at that specific institution

### Avera Cancer Institute

Leyland-Jones, Brian

### British Columbia Cancer Agency

Chia, Stephen  
Serpanchy, Rosanne  
Yu, Carleen

### Emory University

McMillan, Stephanie  
Mosley, Regina  
Nguyen, Kim  
Wood, Eilliam C.  
Zelnak, Amelia

### Georgetown University

Dillis, Charlotte  
Donnelly, Renee  
Harrington, Theresa  
Isaacs, Claudine  
Kallakury, Bhaskar  
( Liu, Minetta )  
Lynce, Filipa  
Oppong, Bridget  
Pohlmann, Paula  
Tousimis, Eleni  
Warren, Robert  
Willey, Shawna  
Wong, Jennifer Eng  
Zeck, Jay

### Loyola University Chicago Medical Center

Albain, Kathy  
Bartolotta, Mary Beth  
Bova, Davide  
Brooks, Cynthia  
Busby, Barbara  
Czaplicki, Kathy

Duan, Xiuzhen  
Gamez, Roberto  
Ganesh, Keith  
Gaynor, Ellen  
Godellas, Constantine  
Grace-Louthen, Cathy  
Kuritz, Theresa  
Lo, Shelly  
Nagamine, Anita  
Perez, Claudia  
Robinson, Patricia  
Rosi, David  
Vaince, Faaiza  
Ward, Kathleen

### Innova Fairfax Hospital

Choquette, Karin  
Edmiston, Kirsten  
Gallimore, Holly  
McGovern, Jutta  
Mokarem, Kerin  
Pajaniappan, Mohana  
Rassulova, Svetlana  
Scott, Kay  
Sherwood, Kristi  
Wright, Jeff

### Mayo Clinic, Arizona

Anderson, Karen S.  
Gray, Richard J.  
Myers, Susan J.  
Northfelt, Donald E.  
Pockaj, Barbara A.  
Roedig, Jennifer  
Wasif, Nabil

### Mayo Clinic, Rochester

Arens, Anne M.  
Bougey, Judy C.  
Brandt, Kathleen R.

Carroll, Jamie L.  
Chen, Beiyun  
Connors, Amy L.  
Degnim, Amy C.  
Farley, David R.  
Greenlee, Susan M.  
Haddad, Tufia C.  
Hieken, Tina J.  
Hobday, Timothy J.  
Jakub, James W.  
Liberte, Lisa La  
Liu, Minetta C.  
Loprinzi, Charles L.  
Menard, Lindsay R.  
Moe, Melissa M.  
Moynihan, Timothy J.  
O'Sullivan, Ciara  
Olson, Emily A.  
Peethambaram, Prema P.  
Ruddy, Kathryn J.  
Russell, Barbara A.  
Rynearson, Amanda L.  
Smith, Deanne R.  
Visscher, Daniel W.  
Windish, Anna J.

H. Lee Moffitt Cancer Center and Research  
Institute

Cox, Kayla  
Dawson, Katrina  
Newton, Odell  
Ramirez, Wilma

Oregon Health and Science University

Bengtson, Heather  
Bucher, Jenna  
Chui, Stephen  
Gilbert-Ghormley, Bridget  
Hampton, Rachel  
Kemmer, Kathleen A.  
Kurdyla, Dot  
Nauman, Deirdre  
Spear, Jonathan  
Wilson, Amy

Swedish Cancer Institute

Beatty, David

Dawson, Pat  
Ellis, Erin R  
Fer, Mehmet  
Hanson, Jim  
Goetz, Matthew P.  
Haddad, Tufia C.  
Iriarte, Desiree  
Kaplan, Henry G.  
Porter, Bruce  
Rinn, Kristine  
Thomas, Hannah  
Thornton, San  
Tickman, Ron  
Varghis, Nina

University of Alabama at Birmingham

Caterinichia, Valerie  
Delos Santos, Jennifer  
Falkson, Carla  
Forero, Andres  
Krontiras, Helen  
Vaklavas, Christos  
Wei, Shi

University of Arizona

Bauland, Amy  
Inclan, Lora  
Lewallen, Dana  
Powell, Alisa  
Roney, Clair  
Schmidt, Kathy  
Viscusi, Rebecca K.  
Wright, Heather

University of California, San Diego

Blair, Sarah  
Boles, Sarah  
Bykowski, Julie  
Datnow, Brian  
Densley, Lindsey  
Eghtedari, Mohammed  
Genna, Vincent  
Hasteh, Farnaz  
Helsten, Teresa  
Kormanik, Patricia  
Ojeda- Fournier, Haydee  
Onyeacholem, Ifeanyi  
Parker, Barbara

Podsada, Kimberly  
Schwab, Richard  
Wallace, Anne  
Yashar, Catherine

University of California, San Francisco

Alvarado, Michael D  
Au, Alfred  
Balassanian, Ronald  
Benz, Chris  
Buxton, Meredith  
Chen, Yunn-Yi  
Chien, Jo  
D'Andrea, Carrie  
Davis, Sarah E.  
Esserman, Laura  
Ewing, Cheryl  
Goga, Andrei  
Hirst, Gillian L.  
Hwang, Mike  
Hylton, Nola  
Joe, Bonnie  
Lyandres, Julia  
Kadafour, Maha  
Krings, Gregor  
Melisko, Michelle  
Moasser, Mark  
Munter, Pamela  
Ngo, Zoe  
Park, John  
Price, Elissa  
Rugo, Hope  
van't Veer, Laura  
Wong, Jasmine  
Yau, Christina

University of Chicago

Abe, Hiroyuki  
Jaskowiak, Nora T  
Nanda, Rita  
Olopade, Funmi  
Schacht, David V.

University of Colorado, Denver

Borges, Virginia  
Colvin, Tiffany  
Diamond, Jennifer  
Elias, Anthony D.

Finlayson, Christina  
Fisher, Christine  
Hardesty, Lara  
Kabos, Peter  
Kounalakis, Nicole  
Mayordomo, Jose  
McSpadden, Tessa  
Murphy, Colleen  
Rabinovitch, Rachel  
Sams, Sharon  
Shagisultanova, Elena

University of Kansas

Baccaray, Stella  
Khan, Qamar

University of Minnesota

Beckwith, Heather  
Blaes, Anne  
Emory, Timothy  
(Haddad, Tufia C.)  
Hui, Jane  
Klein, Molly  
Kuehn-Hajder, Jessica  
Nelson, Michael  
Potter, David  
Tuttle, Todd  
Yee, Douglas  
Zera, Richard

University of Pennsylvania

Bayne, Lauren  
Bradbury, Angela  
Clark, Amy  
DeMichele, Angie  
Domchek, Susan  
Fisher, Carla  
Fox, Kevin  
Frazee, Diane  
Lackaye, Megan  
Matro, Jennifer  
McDonald, Elizabeth  
Rosen, Mark  
Shah, Payal  
Tchou, Julia  
Volpe, Melissa

University of Texas, MD Anderson Cancer Center

Alvarez, Ricardo  
Barcenas, Carlos  
Berry, Donald A.  
Booser, Daniel  
Brewster, Abenna  
Brown, Powell  
Gonzalez-Angulo, Ana  
Ibrahim, Nuhad  
Karuturi, Meghan  
Koenig, Kimberly  
Moulder, Stacy  
Murray, James  
Murthy, Rashmi  
Pusztai, Lajos  
Saigal, Babita  
Symmans, W. Fraser  
Tripathy, Debasish  
Theriault, Richard  
Ueno, Naoto  
Valero, Vicente

University of Southern California

Brown, Maria  
Carranza, Margie  
Flores, Yvonne  
Lang, Julie  
Luna, Amanda  
Perez, Nancy  
(Tripathy, Debasish)  
Watkins, Kristy

University of Texas Southwestern Medical Center

Armstrong, Susan  
Boyd, Chris  
Chen, Lijun  
Clark, Valerie  
Frankel, Arthur  
Euhus, David M  
Froehlich, Thomas  
Goudreau, Sally  
Haley, Barbara  
Harker-Murray, Amy  
Klemow, Dawn  
Leitch, A. Marilyn  
Leon, Rafael

Li, Hsiao  
Morgan, Todd  
Qureshi, Nasir  
Rao, Roshni  
Reeves, Macey  
Rivers, Aeisha  
Sadeghi, Navid  
Seiler, Stephen  
Staves, Barbara  
Tagoe, Vanessa  
Thomas, Geneva  
Tripathy, Debasish  
Unni, Nisha  
Weyandt, Sarah  
Wooldridge, Rachel  
Zuckerman, Julie

University of Washington

Korde, Larissa  
Griffin, Melissa  
Butler, Brianna  
Cundy, Arianne  
Rubinstein, Lena  
Hixson, Christy
